# Supplementary material
Source: Research Square preprint supplement (doi:10.21203/rs.3.rs-8773833/v1)
Supplement: Supplementary file 1 [file c90e881fd1e63f801f68d5b9.docx]

**Topic guide**

**Overall experience:**

Please explain how your hearing loss developed and if/when you received help for it.

What were your feelings and emotions as your hearing got worse?

**Factors associated with using hearing aids:**

Please explain how did you get your hearing aids?

What where your feelings when you started wearing it?

Did you feel confident with the adoption and fitting of the hearing aid?

How is your experience with using the hearing aid?

Did you feel ready when you started using the hearing aid? Why/ why not.

What are the benefits of using hearing aids?

What are the difficulties\challenges you face when using hearing aids?

Device-related challenges, non-device-related challenges

What are the biggest difficulties in getting used to hearing aids?

Are these difficulties constant? Always changing?

Explain how they these difficulties are changing since you started using the hearing aid.

How do you deal with these difficulties?

**External support:**

Did you/do you get enough support to properly use it?

From whom? Family members? clinicians?

Did your clinicians provide enough counselling to equip you to use it properly?

How should clinicians counsel new hearing aid users about getting used to hearing aids?

From whom do you want to get the support to deal with your daily challenges?

Why do you prefer getting help/support specifically from them?

**Final questions:**

Let’s say you have a family member or a friend who is starting to wear hearing aids. What would you tell them if they were to ask you about getting used to wearing hearing aids?

What would you change about your experience with using hearing aids? How can your experience become easier/improved?
